# Supplementary material for: The relevance of Cr defects and photoelectrochemical water oxidation activity of monoclinic PbCrO 4 films
Source: Royal Society of Chemistry journal article supplement (doi:10.1039/d5sc08541a), 2026-01-01
Supplement: d5sc08541a1.pdf [file d5sc08541a1.pdf]

*Supplementary Information*

**The relevance of Cr defects and photoelectrochemical water oxidation  
activity of monoclinic PbCrO<sub>4</sub> films**

Jiahe Li,<sup>a</sup> Gaili Ke,<sup>a</sup> Minji Yang,<sup>b</sup> Guoliang Lv,<sup>a</sup> Lanyi Cao,<sup>a</sup> Wenjun Li,<sup>a</sup> Tao Han,<sup>a</sup>  
Wenrong Wang,<sup>a</sup> Yong Zhou<sup>c</sup> and Huichao He<sup>a\*</sup>

<sup>a</sup>College of Materials and New Energy, Chongqing University of Science and  
Technology, Chongqing 401331, China.

<sup>b</sup>Synthetic Lubricant Oil and Grease Branch, Sinopec Lubricant Co., Ltd., Chongqing,  
400039, China.

<sup>c</sup>Ecomaterials and Renewable Energy Research Center, School of Physics, University  
Nanjing, Nanjing 211102, China

\*Corresponding Author

Email: hehuichao@cqust.edu.cn

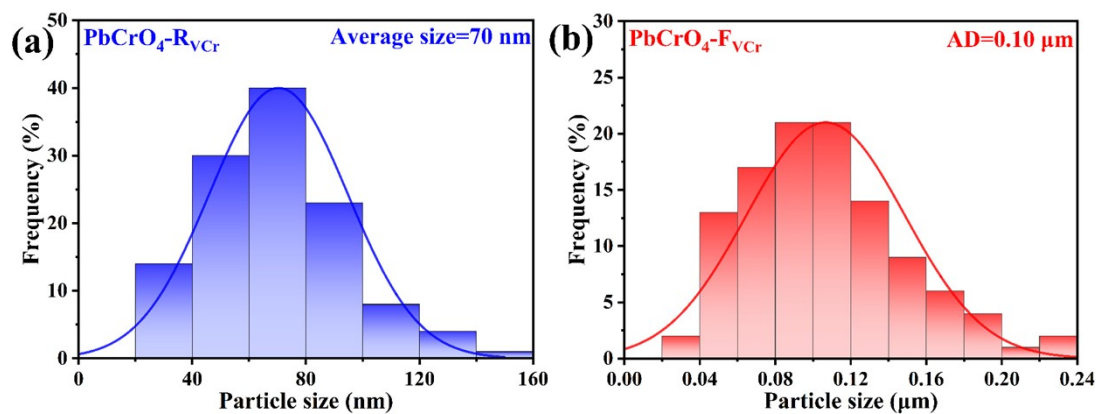

**Fig. S1** The nanoparticles' size distribution of (a) PbCrO<sub>4</sub>-R<sub>VCr</sub> and (b) PbCrO<sub>4</sub>-F<sub>VCr</sub> films.

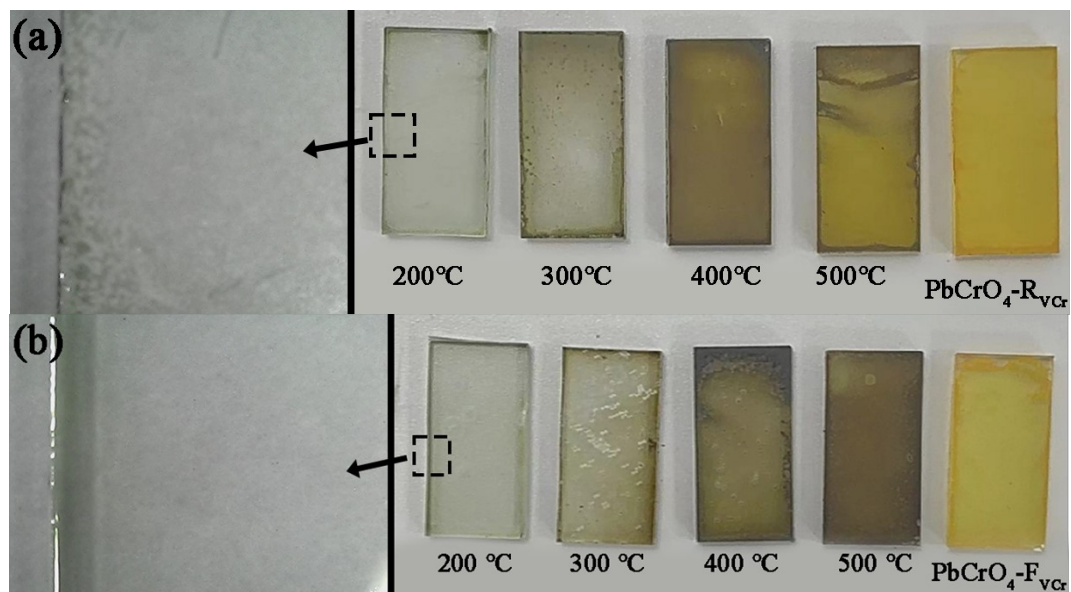

**Fig. S2** The photographs of the  $\text{Pb}^{2+}/\text{Cr}^{3+}$  precursor solution during thermal treating at different temperatures for the preparation of (a)  $\text{PbCrO}_4\text{-R}_{\text{VCr}}$  and (b)  $\text{PbCrO}_4\text{-F}_{\text{VCr}}$  films.

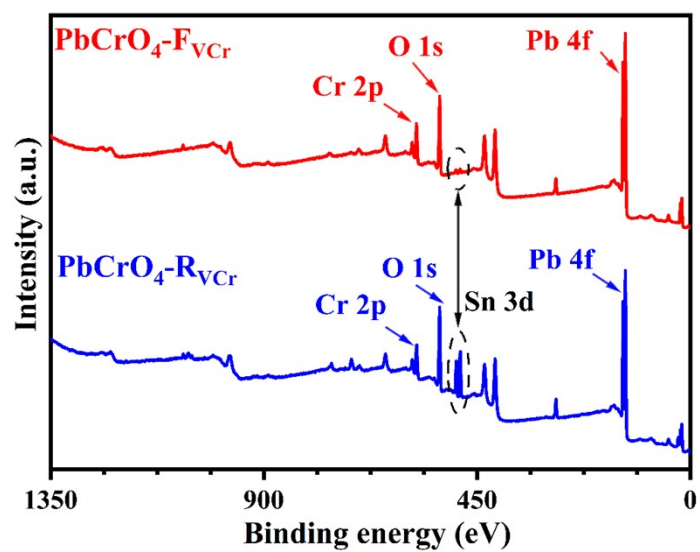

**Fig. S3** Survey XPS spectrum of  $\text{PbCrO}_4\text{-R}_{\text{VCr}}$  and  $\text{PbCrO}_4\text{-F}_{\text{VCr}}$  films.

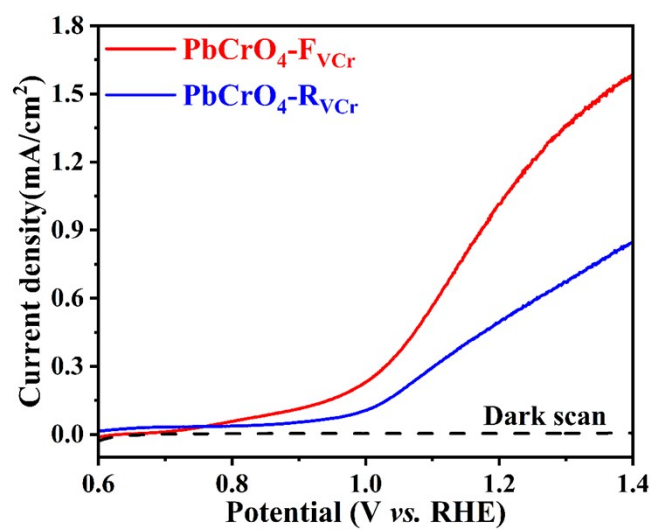

**Fig. S4** Under AM 1.5G illumination, LSV curves of PbCrO<sub>4</sub>-R<sub>VCr</sub> and PbCrO<sub>4</sub>-F<sub>VCr</sub> film photoanodes in 0.5 M PBS.

**Table S1** The activity comparison of our PbCrO<sub>4</sub>-F<sub>VCr</sub> film photoanodes to previously reported PbCrO<sub>4</sub> film photoanodes.

| Electrolyte (pH)                                                                       | $J$ (mA/cm <sup>2</sup> )   | <i>Ref.</i>      |
|----------------------------------------------------------------------------------------|-----------------------------|------------------|
| 0.5 M phosphate buffer (pH 7)                                                          | 1.14 (at 1.23V vs. RHE)     | <b>this work</b> |
| 0.1 M Na <sub>2</sub> SO <sub>4</sub> and 0.1 M Na <sub>2</sub> SO <sub>3</sub> (pH 7) | 0.03 (at 0.4 V vs. Ag/AgCl) | [1]              |
| 0.1 M phosphate buffer (pH 6.8)                                                        | 0.30 (at 1.23V vs. RHE)     | [2]              |
| 0.1 M borate buffer (pH 9)                                                             | ~0.10 (at 1.23V vs. RHE)    | [3]              |
| 0.2 M phosphate buffer (pH 7)                                                          | 0.57 (at 1.23V vs. RHE)     | [4]              |
| 0.5 M phosphate buffer (pH 7)                                                          | 2.70 (at 1.23V vs. RHE)     | [5]              |
| 0.1 M phosphate buffer (pH 7)                                                          | 0.06 (at 0.95V vs. RHE)     | [6]              |
| 0.5 M phosphate buffer (pH 7)                                                          | 3.43 (at 1.23V vs. RHE)     | [7]              |
| 0.5 M phosphate buffer (pH 7)                                                          | ~0.55 (at 1.23V vs. RHE)    | [8]              |

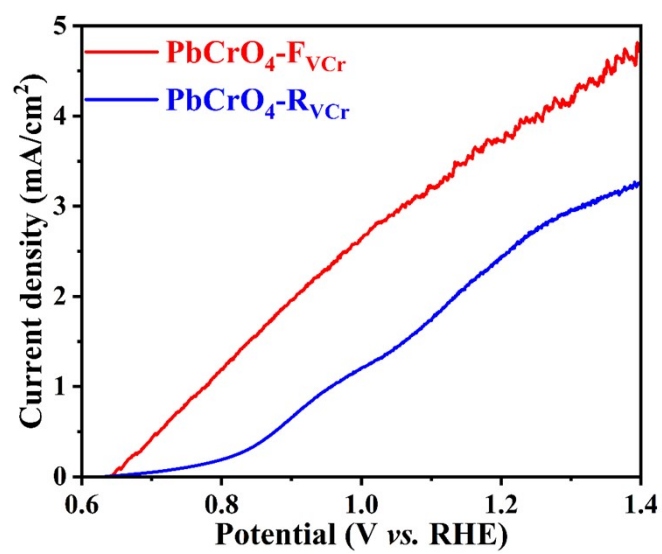

**Fig. S5** Under AM 1.5G illumination, LSV curves of  $\text{PbCrO}_4\text{-R}_{\text{VCr}}$  and  $\text{PbCrO}_4\text{-F}_{\text{VCr}}$  film photoanodes in 0.5 M PBS/0.2 vol.%  $\text{H}_2\text{O}_2$ .

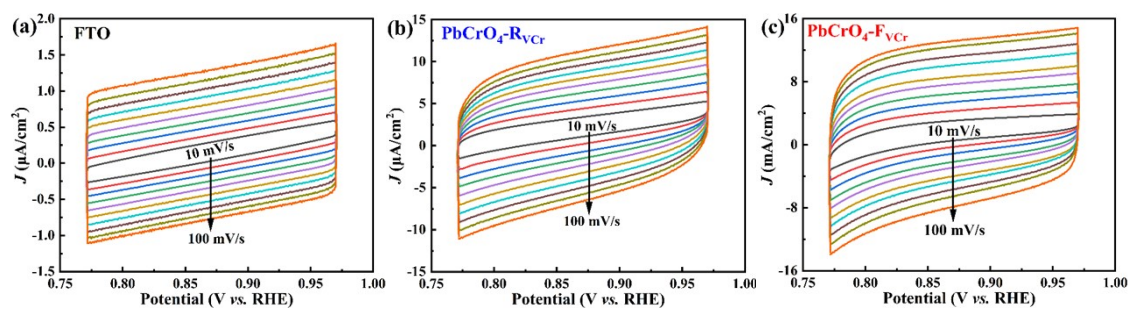

**Fig. S6** CV curves of (a) FTO, (b)  $\text{PbCrO}_4\text{-R}_{\text{VCr}}$ , (c)  $\text{PbCrO}_4\text{-F}_{\text{VCr}}$  at different scan rates (10, 20, 30, 40, 50, 60, 70, 80, 90 and 100 mV/s).



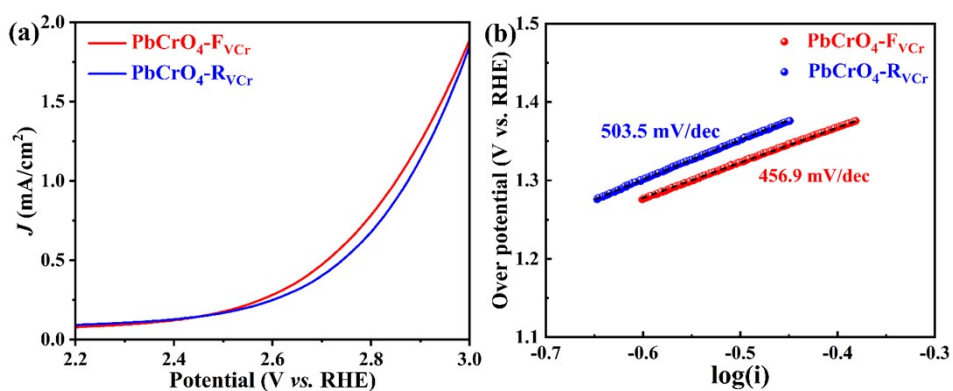

**Fig. S7** In dark condition, (a) LSV curves and (b) Tafel plots for  $\text{PbCrO}_4\text{-R}_{\text{VCr}}$  and  $\text{PbCrO}_4\text{-F}_{\text{VCr}}$  film electrodes in 0.5 M PBS.

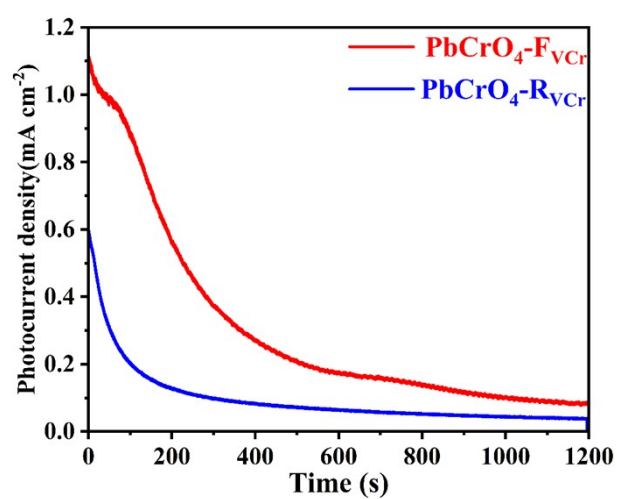

**Fig. S8** *j*-*t* curves of PbCrO<sub>4</sub>-R<sub>V</sub>Cr and PbCrO<sub>4</sub>-F<sub>V</sub>Cr film photoanodes in 0.5 M PBS under AM 1.5 G irradiation at 1.23 V vs. RHE.

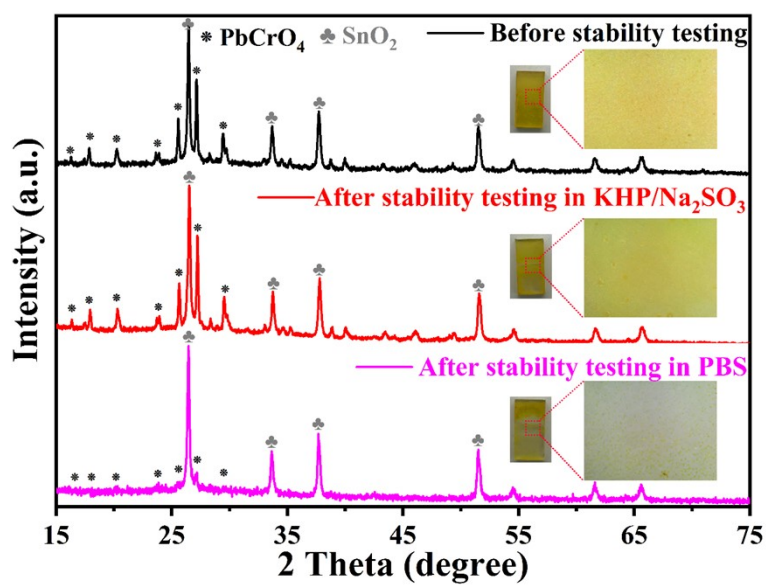

**Fig. S9** XRD patterns of  $\text{PbCrO}_4\text{-F}_{\text{VCr}}$  films before and after stability testing in  $\text{KHP}/\text{Na}_2\text{SO}_3$  (shown in **Fig. 5d**) and PBS (shown in **Fig. S8**) electrolyte.

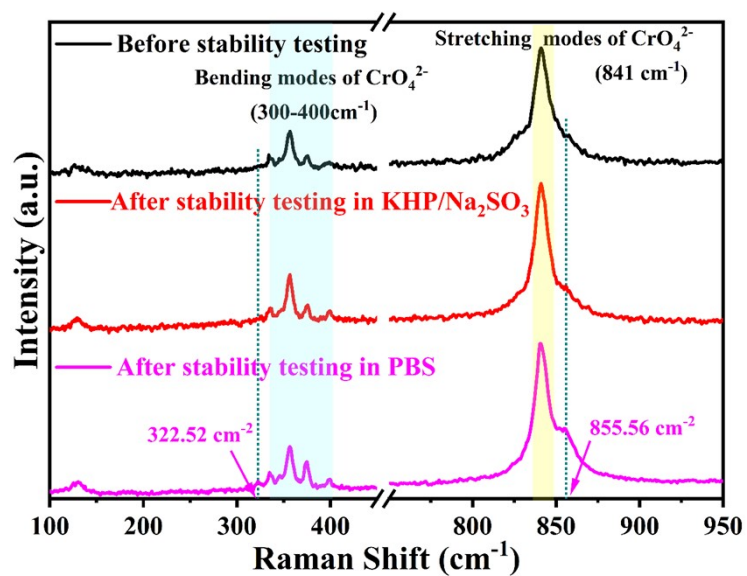

**Fig. S10** Raman spectra of  $\text{PbCrO}_4\text{-F}_{\text{VCr}}$  films before and after stability testing in KHP/ $\text{Na}_2\text{SO}_3$  (shown in **Fig. 5d**) and PBS (shown in **Fig. S8**) electrolyte.

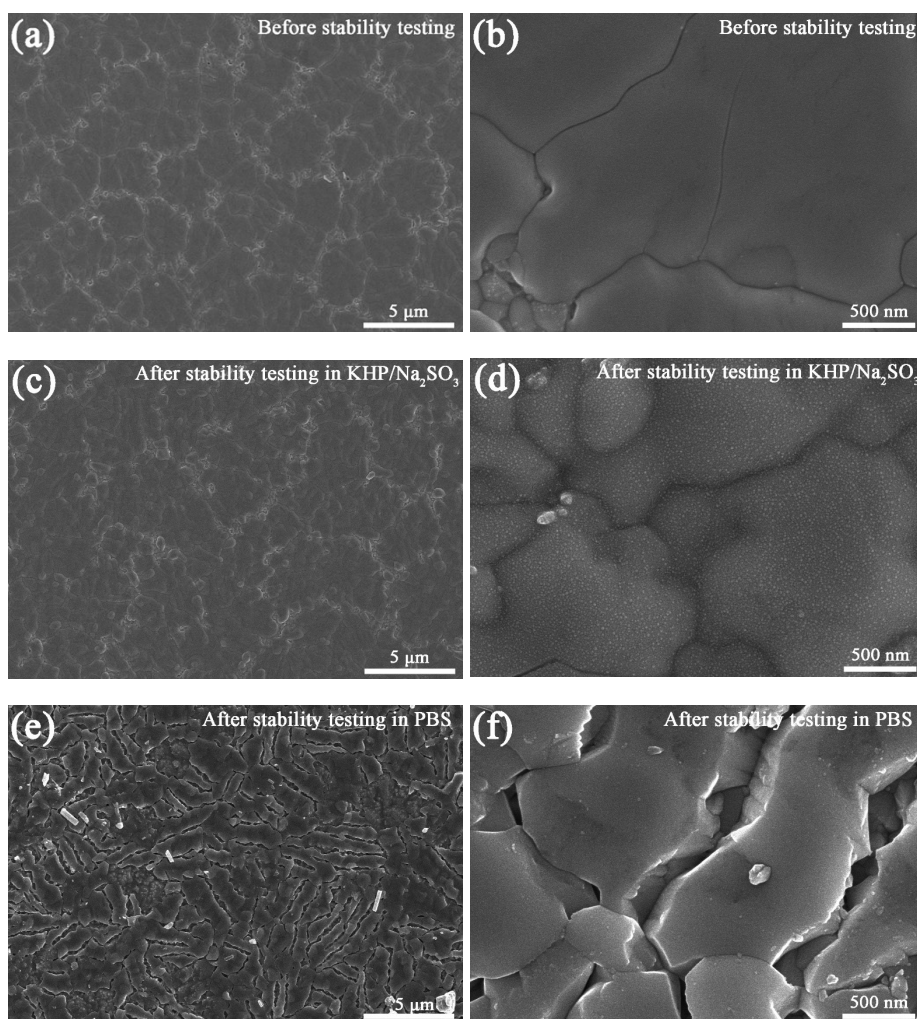

**Fig. S11** SEM images of PbCrO<sub>4</sub>-F<sub>VCr</sub> films (a, b) before and after stability testing in (c, d) KHP/Na<sub>2</sub>SO<sub>3</sub> (shown in **Fig. 5d**) and (e, f) PBS (shown in **Fig. S8**) electrolyte.

**Table S2** The simulated ion activity product (IAP) and saturation index (*Sat. index*) of PbCrO<sub>4</sub> film in PBS solution.

| Compound                                             | <i>log IAP</i> | <i>Sat. index</i> | Saturation      |
|------------------------------------------------------|----------------|-------------------|-----------------|
| CrO <sub>3</sub> (s)                                 | -22.232        | -19.022           | Undersaturation |
| Pb <sub>5</sub> (PO <sub>4</sub> ) <sub>3</sub> (OH) | -61.949        | 0.841             | Oversaturation  |
| PbO (Massicot)                                       | 2.14           | -10.55            | Undersaturation |
| PbO (Litharge)                                       | 2.14           | -10.75            | Undersaturation |
| Pb(OH) <sub>2</sub> (s)                              | 2.077          | -6.073            | Undersaturation |
| Pb <sub>2</sub> O(OH) <sub>2</sub> (s)               | 4.217          | -21.973           | Undersaturation |
| Pb <sub>3</sub> (PO <sub>4</sub> ) <sub>2</sub> (s)  | -41.991        | 1.539             | Oversaturation  |
| PbCrO <sub>4</sub> (s)                               | -20.092        | -7.492            | Undersaturation |
| PbHPO <sub>4</sub> (s)                               | -22.097        | 1.708             | Oversaturation  |
| PbO:0.3H <sub>2</sub> O(s)                           | 2.119          | -10.861           | Undersaturation |

## Results and discussion for Fig. S9 to S11, and Table S2.

To understand the PEC stability feature of  $\text{PbCrO}_4\text{-F}_{\text{VCr}}$  films, we have detected the XRD patterns, Raman spectrum and SEM images for the  $\text{PbCrO}_4\text{-F}_{\text{VCr}}$  films after stability testing in  $\text{KHP/Na}_2\text{SO}_3$  (shown in **Fig. 5d**) and PBS (shown in **Fig. S8**) electrolyte, respectively. As shown in **Fig. S9**, the XRD patterns of  $\text{PbCrO}_4\text{-F}_{\text{VCr}}$  film after stability testing in  $\text{KHP/Na}_2\text{SO}_3$  are very close to those of it before stability testing. Meanwhile, the  $\text{PbCrO}_4\text{-F}_{\text{VCr}}$  film after stability testing in  $\text{KHP/Na}_2\text{SO}_3$  had no obvious color change, relative to it before stability testing (insert of **Fig. S9**). But for the  $\text{PbCrO}_4\text{-F}_{\text{VCr}}$  film after stability testing in PBS, its XRD patterns partially changed, the diffraction peaks of monoclinic  $\text{PbCrO}_4$  (PDF#: 08-0209) at  $25.58^\circ$ ,  $27.16^\circ$  and  $29.45^\circ$  disappeared. In addition, the color of  $\text{PbCrO}_4\text{-F}_{\text{VCr}}$  film after stability testing in PBS was turned to faint yellow, suggesting the presence of composition changes. Further Raman spectrum detections indicated that two new peaks ( $322.52\text{ cm}^{-1}$  and  $855.56\text{ cm}^{-1}$ ) be formed in the Raman spectrum of the  $\text{PbCrO}_4\text{-F}_{\text{VCr}}$  film after stability testing in PBS, compared with it before testing and testing in  $\text{KHP/Na}_2\text{SO}_3$  (**Fig. S10**). SEM observations showed that the  $\text{PbCrO}_4\text{-F}_{\text{VCr}}$  film after stability testing in  $\text{KHP/Na}_2\text{SO}_3$  has no obvious change in morphology (**Fig. S11c** and **S11d**), in comparison with it before testing (**Fig. S11a** and **S11b**). But after the stability testing in PBS, significant gaps were observed on the  $\text{PbCrO}_4\text{-F}_{\text{VCr}}$  film (**Fig. S113e** and **S11f**), indicating dissolution characteristics.

To understand the morphology change of  $\text{PbCrO}_4\text{-F}_{\text{VCr}}$  film photoanodes after stability testing in PBS, the ion activity product (*IAP*) and saturation index of compounds that could be potentially formed through the dissolution and transformation of  $\text{PbCrO}_4$  in PBS solution were simulated using Visual MINTEQ software. The saturation index of compounds (*Sat. index* =  $\log(IAP/K_{sp})$ ) in aqueous solution above 0

usually means potential dissolution tendency. As shown in **Table S2**, the saturation index of  $\text{Pb}_5(\text{PO}_4)_3(\text{OH})$ ,  $\text{Pb}_3(\text{PO}_4)_2(\text{s})$  and  $\text{PbHPO}_4(\text{s})$  could be formed through the transformation of  $\text{PbCrO}_4$  in PBS solution, and their *Sat.* index are below 0, having dissolution tendency. Additionally, the semiconductors with variable valence state elements are easy to suffer from photocorrosion, since the electrons/holes of semiconductors cannot be transferred and consumed by reactions quickly, the cumulative electrons/holes in/on semiconductors could initiate photocorrosion through reacting with the variable valence elements of semiconductors [9]. Pb has two common valence states of +2 and +4, while Cr has +6 and +3. For  $\text{PbCrO}_4$ , its Pb is +2 and Cr is +6. During the PEC reaction on  $\text{PbCrO}_4$  photoelectrodes, the Pb(II) could be oxidized into Pb(IV) by the electrons of  $\text{PbCrO}_4$ , while the Cr(VI) could be oxidized into Cr(III) by the holes of  $\text{PbCrO}_4$  [8]. From above results and analyses, it can be known that  $\text{PbCrO}_4\text{-F}_{\text{VCr}}$  film photoanodes encounter photocorrosion and dissolution issue in PBS during stability testing.



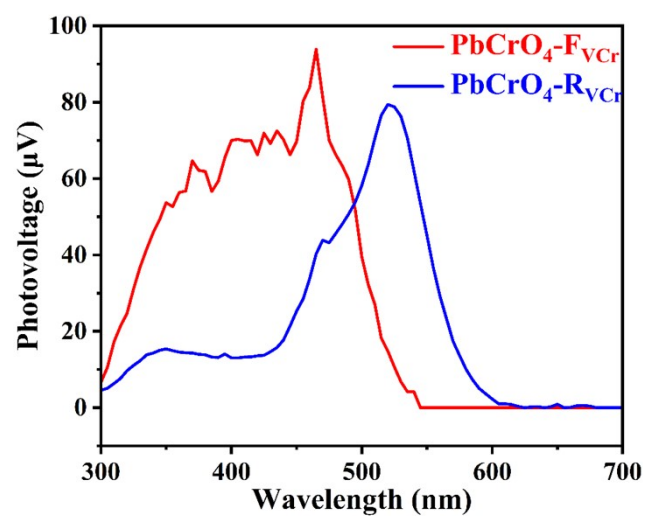

**Fig. S12** Surface photovoltage spectra of  $\text{PbCrO}_4\text{-R}_{\text{VCr}}$  and  $\text{PbCrO}_4\text{-F}_{\text{VCr}}$  films in air.

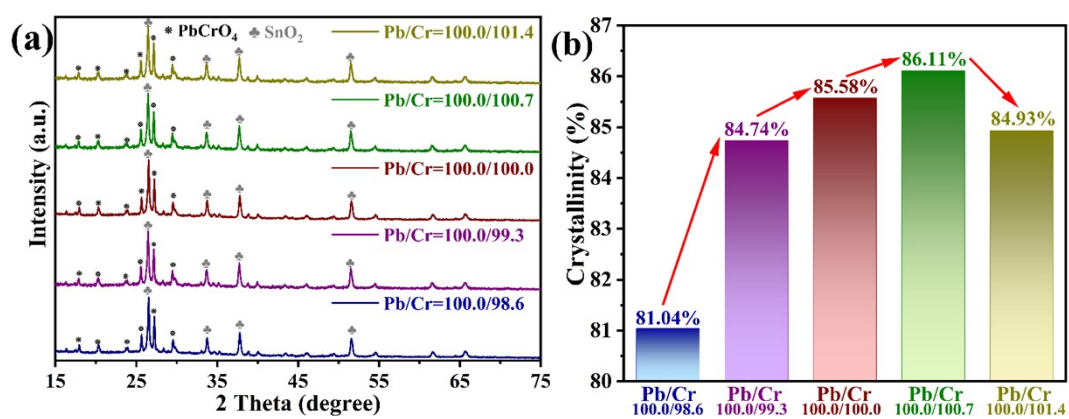

**Fig. S13** (a) XRD pattern and (b) crystallinity of PbCrO<sub>4</sub> films which were prepared using precursor solution with different Pb/Cr atomic ratios.

**Table S3** The crystallinities of PbCrO<sub>4</sub> films which were prepared using precursor solution with different Pb/Cr atomic ratios.

| Sample            | <i>hkl</i> | $2\theta$ | <i>FWHM</i> | Crystallinity (%) |
|-------------------|------------|-----------|-------------|-------------------|
| Pb/Cr=100.0/98.6  | (200)      | 25.560    | 0.152       | 81.04             |
|                   | (120)      | 27.149    | 0.120       |                   |
| Pb/Cr=100.0/99.3  | (200)      | 25.566    | 0.165       | 84.74             |
|                   | (120)      | 27.150    | 0.148       |                   |
| Pb/Cr=100.0/100.0 | (200)      | 25.624    | 0.118       | 80.41             |
|                   | (120)      | 27.218    | 0.107       |                   |
| Pb/Cr=100.0/100.7 | (200)      | 25.557    | 0.154       | 86.11             |
|                   | (120)      | 27.143    | 0.138       |                   |
| Pb/Cr=100.0/101.4 | (200)      | 25.552    | 0.176       | 84.93             |
|                   | (120)      | 27.146    | 0.146       |                   |

## Reference

1. H. C. Lee, S. K. Cho, H. S. Park, K. M. Nam and A. J. Bard, *J. Phys. Chem. C*, 2017, **121**, 17561- 17568.
2. S. K. Cho, R. Akbar, J. Kang, W. Lee and H. S. Park, *J. Mater. Chem. A*, 2018, **6**, 13312- 13320.
3. A. E. Lindberg, W. Wang, S. Zhang, G. Galli and K. S. Choi, *ACS Appl. Energy Mater.*, 2020, **3**, 8658- 8666.
4. J. Kang, Y. R. Gwon and S. K. Cho, *J. Electroanal. Chem.*, 2020, **878**, 114601.
5. H. Zhou, D. Zhang, X. Gong, Z. Feng, M. Shi, Y. Liu, C. Zhang, P. Luan, P. Zhang, F. Fan, R. Li and C. Li, *Adv. Mater.*, 2022, **34**, 2110610.
6. W. Jiang, C. Ni, L. Zhang, M. Shi, J. Qu, H. Zhao, C. Zhao, R. Chen, X. Wang, C. Li, and R. Li, *Angew. Chem. Int. Ed.* 2022, **61**, e202207161.
7. H. Zhou, D. Zhang, H. Xie, Y. Liu, C. Meng, P. Zhang, F. Fan, R. Li and C. Li, *Adv. Mater.*, 2023, **35**, 2300914.
8. J. Li, Y. Huang, H. Wang, M. Yang, T. Han, G. Ke, W. Wang, H. Jiang and H. He, *Langmuir*, 2025, **41**, 20096–20104.
9. S. Chen, D. Huang, P. Xu, W. Xue, L. Lei, M. Cheng, R. Wang, X. Liu and R. Deng, *J. Mater. Chem. A*, 2020, **8**, 2286-2322.
